# Supplementary material for: The origin of the odorant receptor gene family in insects
Source: PubMed Central journal article supplement (PMC6080948; doi:10.7554/elife.38340), 2018-07-31

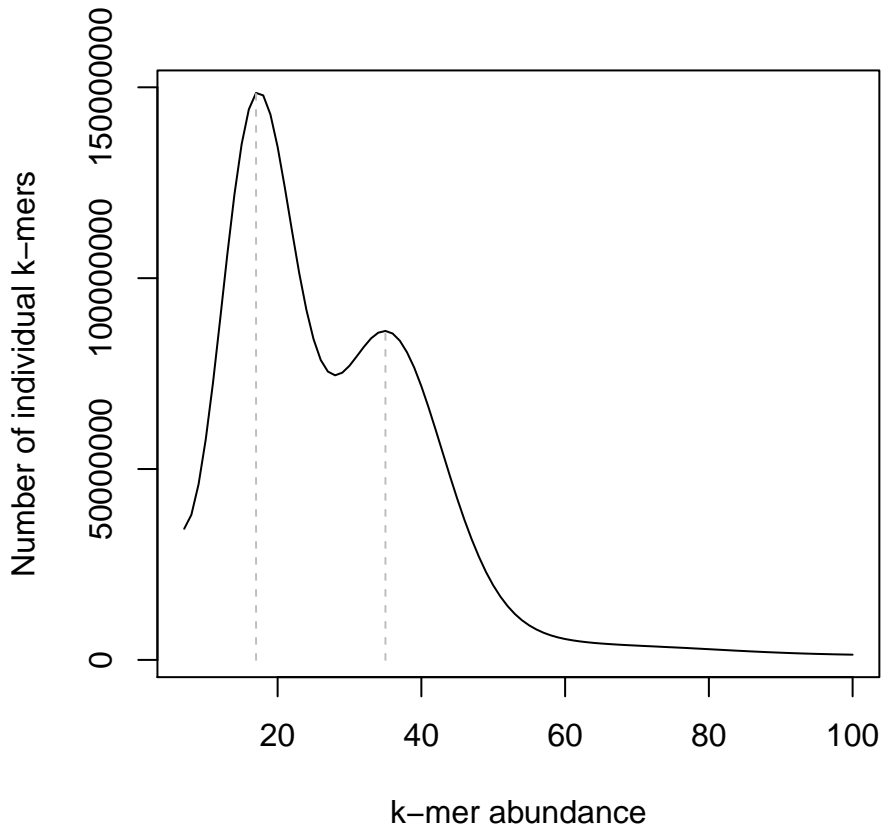

Supplement: elife-38340-supp2.pdf [file elife-38340-supp2.pdf]
